# Supplementary material for: Cheminformatics Identification and Validation of Dipeptidyl Peptidase-IV Modulators from Shikimate Pathway-Derived Phenolic Acids towards Interventive Type-2 Diabetes Therapy
Source: MDPI journal article supplement (doi:10.3390/metabo12100937), 2022-10-02
Supplement: s1 [file s1]

**Table S1.** Average RMSD, RMSF, RoG and SASA values of DPP-IV in complex with chlorogenic acid and Diprotin A.

| <b>Complexes</b>                 | <b>Average RMSD (Å)</b> | <b>Average RMSF (Å)</b> | <b>Average ROG (Å)</b> | <b>Average SASA (Å)</b> |
|----------------------------------|-------------------------|-------------------------|------------------------|-------------------------|
| <b>DPP-IV + Chlorogenic acid</b> | 1.76 ± 0.14             | 1.08 ± 0.50             | 26.95 ± 0.08           | 24324.70 ± 328.06       |
| <b>DPP-IV + Diprotin A</b>       | 1.96 ± 0.20             | 1.18 ± 0.56             | 26.96 ± 0.10           | 24636.10 ± 371.14       |
| <b>DPP-IV</b>                    | 1.69 ± 0.16             | 1.13 ± 0.78             | 27.18 ± 0.10           | 24982.98 ± 367.09       |
